# Supplementary material for: Gut microbiota controls the development of chronic pancreatitis: A critical role of short-chain fatty acids-producing Gram-positive bacteria
Source: PubMed Central journal article supplement — Acta Pharm Sin B. 2023 Aug 7;13(10):4202–16. doi: 10.1016/j.apsb.2023.08.002 (PMC10547962; doi:10.1016/j.apsb.2023.08.002), 2023-08-07
Supplement: mmc1.pdf [file mmc1.pdf]

## Supporting Information for

Original article

# **Gut microbiota controls the development of chronic pancreatitis: A critical role of short-chain fatty acids-producing Gram-positive bacteria**

**Li-Long Pan<sup>a,†</sup>, Zheng-Nan Ren<sup>b,c,†</sup>, Jun Yang<sup>d,†</sup>, Bin-Bin Li<sup>b,c,†</sup>, Yi-Wen Huang<sup>b,c</sup>, Dong-Xiao Song<sup>b,c</sup>, Xuan Li<sup>b,c</sup>, Jia-Jia Xu<sup>e</sup>, Madhav Bhatia<sup>f</sup>, Duo-Wu Zou<sup>g</sup>, Chun-Hua Zhou<sup>g</sup>, Jia Sun<sup>b,c,\*</sup>**

<sup>a</sup>*Wuxi Medical School, Jiangnan University, Wuxi 214122, China*

<sup>b</sup>*School of Food Science and Technology, Jiangnan University, Wuxi 214122, China*

<sup>c</sup>*State Key Laboratory of Food Science and Resources, Jiangnan University, Wuxi 214122, China*

<sup>d</sup>*Department of General Surgery, Affiliated Hospital of Jiangnan University, Wuxi 214122, China*

<sup>e</sup>*Department of general medicine, Beicai Community Health Service Center of Pudong New District, Shanghai 214001, China*

<sup>f</sup>*Department of Pathology, University of Otago, Christchurch 8140, New Zealand*

<sup>g</sup>*Department of Gastroenterology, Ruijin Hospital Affiliated to Shanghai Jiao Tong University School of Medicine, Shanghai 200025, China*

Received 28 February 2023; received in revised form 21 May 2023; accepted 13 June 2023

\* Corresponding author.

E-mail address: [jiasun@jiangnan.edu.cn](mailto:jiasun@jiangnan.edu.cn) (Jia Sun).

<sup>†</sup>These authors made equal contributions to this work.

## Table of contents

| Contents                                                                                                                                                                | Pages |
|-------------------------------------------------------------------------------------------------------------------------------------------------------------------------|-------|
| <b>Table S1:</b> The characteristics of predominant microbial taxa of control mice, CP mice and broad-spectrum ABX-treated CP mice.                                     | 3     |
| <b>Table S2:</b> The characteristics of predominant microbial taxa of CP mice and broad-spectrum ABX-treated CP mice.                                                   | 4     |
| <b>Table S3:</b> The characteristics of predominant microbial taxa of healthy participants and CP patients.                                                             | 5     |
| <b>Table S4:</b> The characteristics of predominant microbial taxa of control mice, CP mice, G <sup>+</sup> ABX-treated CP mice and G <sup>-</sup> ABX-treated CP mice. | 6     |
| <b>Figure S1:</b> Schematic diagram showing the experimental design and timeline of CP mice with different treatments.                                                  | 7     |
| <b>Figure S2:</b> Gating strategies for flow cytometry.                                                                                                                 | 8     |
| <b>Figure S3:</b> The LEfSe analyses of microbiome composition distribution of CP mice and broad-spectrum ABX-treated CP mice.                                          | 9     |
| <b>Figure S4:</b> The LEfSe analyses of microbiome composition of control mice, CP mice, G <sup>+</sup> ABX-treated CP mice and G <sup>-</sup> ABX-treated CP mice.     | 10    |
| <b>Figure S5:</b> Depletion of G <sup>+</sup> bacteria but not G <sup>-</sup> bacteria compromises gut barrier function in mice with CP.                                | 11    |
| <b>Figure S6:</b> TLR4 deficiency does not affect the frequency of monocytes and macrophages.                                                                           | 12    |
| <b>Figure S7:</b> SCFAs improve gut barrier dysfunction and alleviate the severity of CP..                                                                              | 13    |
| References for Supporting material                                                                                                                                      | 14-15 |

**Table S1**, related to **Figure 1C**: The characteristics of predominant microbial taxa of control mice, CP mice and broad-spectrum ABX-treated CP mice.

| Group                                   | Bacteria                                      | G <sup>+</sup> or G <sup>-</sup> | SCFAs-producer     |
|-----------------------------------------|-----------------------------------------------|----------------------------------|--------------------|
| Con                                     | <i>g__Lactobacillus</i>                       | G <sup>+</sup>                   | Yes <sup>1</sup>   |
|                                         | <i>f__Muribaculaceae</i>                      | G <sup>-</sup>                   | Yes <sup>2</sup>   |
|                                         | <i>g__Lachnospiraceae NK4A136 group</i>       | G <sup>+</sup>                   | Yes <sup>3,4</sup> |
|                                         | <i>g__Faecalibaculum</i>                      | G <sup>+</sup>                   | Yes <sup>5</sup>   |
|                                         | <i>g__Prevotellaceae NK3B31 group</i>         | G <sup>-</sup>                   | Yes <sup>6</sup>   |
|                                         | <i>g__Alloprevotella</i>                      | G <sup>-</sup>                   |                    |
|                                         | <i>g__Lachnospiraceae</i>                     | G <sup>+</sup>                   | Yes <sup>7</sup>   |
|                                         | <i>g__Ruminococcus 1</i>                      | G <sup>+</sup>                   | Yes <sup>5</sup>   |
|                                         | <i>g__Ruminococcaceae UCG_014</i>             | G <sup>+</sup>                   | Yes <sup>4,8</sup> |
|                                         | <i>f__Lachnospiraceae g_uncultured</i>        | G <sup>+</sup>                   | Yes <sup>3</sup>   |
|                                         | <i>g__Desulfovibrio</i>                       | G <sup>-</sup>                   | Yes <sup>4</sup>   |
|                                         | <i>g__Eubacterium_coprostanoligenes group</i> | G <sup>+</sup>                   |                    |
|                                         | <i>g__Roseburia</i>                           | G <sup>+</sup>                   | Yes <sup>5</sup>   |
|                                         | <i>g__Rikenellaceae RC9 gut group</i>         | G <sup>-</sup>                   | Yes <sup>9</sup>   |
|                                         | <i>g__A2</i>                                  | G <sup>+</sup>                   | Yes <sup>3</sup>   |
|                                         | <i>g__Eubacterium_xylanophilum group</i>      | G <sup>+</sup>                   |                    |
|                                         | <i>g__Ruminiclostridium 6</i>                 | G <sup>+</sup>                   | Yes <sup>7</sup>   |
|                                         | <i>g__ASF356</i>                              | G <sup>+</sup>                   | Yes <sup>10</sup>  |
|                                         | <i>g__Ruminococcaceae UCG_009</i>             | G <sup>+</sup>                   | Yes <sup>4,8</sup> |
|                                         | <i>g__Lachnospiraceae UCG_001</i>             | G <sup>+</sup>                   | Yes <sup>3</sup>   |
|                                         | <i>g__Candidatus Saccharimonas</i>            | G <sup>+</sup>                   |                    |
|                                         | <i>g__Ruminococcaceae UCG_010</i>             | G <sup>+</sup>                   | Yes <sup>4,8</sup> |
|                                         | <i>g__Defluviitaleaceae UCG_011</i>           | G <sup>+</sup>                   |                    |
|                                         | <i>g__Acetatifactor</i>                       | G <sup>+</sup>                   |                    |
|                                         | <i>g__Candidatus Arthromitus</i>              | G <sup>+</sup>                   |                    |
|                                         | <i>f__Peptococcaceae g_uncultured</i>         | G <sup>+</sup>                   | Yes <sup>11</sup>  |
|                                         | <i>g__Ruminococcaceae UCG_004</i>             | G <sup>+</sup>                   | Yes <sup>4,8</sup> |
|                                         | <i>f__Desulfovibrionaceae</i>                 | G <sup>-</sup>                   |                    |
|                                         | <i>f__Christensenellaceae</i>                 | G <sup>-</sup>                   | Yes <sup>12</sup>  |
|                                         | <i>g__Coriobacteriaceae UCG_002</i>           | G <sup>+</sup>                   | Yes <sup>13</sup>  |
|                                         | <i>g__Family XIII UCG_001</i>                 | G <sup>+</sup>                   |                    |
|                                         | <i>g__Tyzzerella 3</i>                        | G <sup>+</sup>                   |                    |
| <i>g__Ruminococcaceae NK4A214 group</i> | G <sup>+</sup>                                | Yes <sup>4,8</sup>               |                    |
| CAE                                     | <i>g__Bifidobacterium</i>                     | G <sup>+</sup>                   | Yes <sup>1</sup>   |
|                                         | <i>f__Clostridiales vadin BB60 group</i>      |                                  |                    |
|                                         | <i>g__Ruminiclostridium 5</i>                 | G <sup>+</sup>                   | Yes <sup>7</sup>   |
|                                         | <i>g__Lachnospiraceae FCS020 group</i>        | G <sup>+</sup>                   | Yes <sup>3,4</sup> |
|                                         | <i>g__Anaerotruncus</i>                       | G <sup>+</sup>                   | Yes <sup>4</sup>   |
| ABX+CAE                                 | <i>o__Rhodospirillales</i>                    | G <sup>-</sup>                   | Yes <sup>1</sup>   |
|                                         | <i>g__Bacteroides</i>                         | G <sup>-</sup>                   | Yes <sup>5</sup>   |
|                                         | <i>g__Escherichia_Shigella</i>                | G <sup>-</sup>                   |                    |
|                                         | <i>g__Erysipelatoclostridium</i>              | G <sup>+</sup>                   |                    |
|                                         | <i>o__Gastranaerophilales</i>                 | G <sup>-</sup>                   |                    |
|                                         | <i>g__Clostridioides</i>                      | G <sup>+</sup>                   | Yes <sup>5</sup>   |
|                                         | <i>g__Enterococcus</i>                        | G <sup>+</sup>                   | Yes <sup>14</sup>  |
|                                         | <i>g__Proteus</i>                             | G <sup>-</sup>                   |                    |

G<sup>+</sup>: Gram-positive bacteria; G<sup>-</sup>: Gram-negative bacteria

**Table S2**, related to **Figure S3**: The characteristics of predominant microbial taxa of CP mice and broad-spectrum ABX-treated CP mice.

| Group                         | Bacteria                                      | G <sup>+</sup> or G <sup>-</sup> | SCFAs-producer     |
|-------------------------------|-----------------------------------------------|----------------------------------|--------------------|
| CAE                           | <i>f__Peptococcaceae g_uncultured</i>         | G <sup>+</sup>                   | Yes <sup>11</sup>  |
|                               | <i>g__Ruminococcaceae UCG_009</i>             | G <sup>+</sup>                   | Yes <sup>4,8</sup> |
|                               | <i>g__Anaerotruncus</i>                       | G <sup>+</sup>                   | Yes <sup>4</sup>   |
|                               | <i>g__Lachnospiraceae FCS020group</i>         | G <sup>+</sup>                   | Yes <sup>3,4</sup> |
|                               | <i>g__Defluviitaleaceae UCG_011</i>           | G <sup>+</sup>                   |                    |
|                               | <i>g__Ruminococcaceae UCG_010</i>             | G <sup>+</sup>                   | Yes <sup>4,8</sup> |
|                               | <i>g__Enterorhabdus</i>                       | G <sup>+</sup>                   |                    |
|                               | <i>g__ASF356</i>                              | G <sup>+</sup>                   | Yes <sup>10</sup>  |
|                               | <i>g__Butyricoccus</i>                        | G <sup>+</sup>                   | Yes <sup>15</sup>  |
|                               | <i>g__Lachnospiraceae UCG_001</i>             | G <sup>+</sup>                   | Yes <sup>3</sup>   |
|                               | <i>g__A2</i>                                  | G <sup>+</sup>                   | Yes <sup>3</sup>   |
|                               | <i>g__Eubacterium_coprostanoligenes group</i> | G <sup>+</sup>                   |                    |
|                               | <i>g__Lachnoclostridium</i>                   | G <sup>+</sup>                   | Yes <sup>7</sup>   |
| <i>g__Ruminiclostridium 5</i> | G <sup>+</sup>                                | Yes <sup>7</sup>                 |                    |
| <i>g__Lactobacillus</i>       | G <sup>+</sup>                                | Yes <sup>1</sup>                 |                    |
| ABX+CAE                       | <i>o__Rhodospirillales</i>                    | G <sup>-</sup>                   | Yes <sup>1</sup>   |
|                               | <i>g__Bacteroides</i>                         | G <sup>-</sup>                   | Yes <sup>5</sup>   |
|                               | <i>g__Erysipelatoclostridium</i>              | G <sup>+</sup>                   |                    |
|                               | <i>o__Gastranaerophilales</i>                 | G <sup>-</sup>                   |                    |
|                               | <i>g__Parabacteroides</i>                     | G <sup>-</sup>                   | Yes <sup>16</sup>  |
|                               | <i>g__Odoribacter</i>                         | G <sup>-</sup>                   |                    |
|                               | <i>f__Ruminococcaceae g_uncultured</i>        | G <sup>+</sup>                   | Yes <sup>4,8</sup> |
|                               | <i>g__Lachnospiraceae UCG_006</i>             | G <sup>+</sup>                   | Yes <sup>3</sup>   |
|                               | <i>g__Clostridioides</i>                      | G <sup>+</sup>                   | Yes <sup>5</sup>   |
|                               | <i>g__Ruminiclostridium 6</i>                 | G <sup>+</sup>                   | Yes <sup>7</sup>   |
| <i>g__Enterococcus</i>        | G <sup>+</sup>                                | Yes <sup>14</sup>                |                    |

G<sup>+</sup>: Gram-positive bacteria; G<sup>-</sup>: Gram-negative bacteria

**Table S3**, related to **Figure 1E**: The characteristics of predominant microbial taxa of healthy participants and CP patients.

| Group                | Bacteria                                | G <sup>+</sup> or G <sup>-</sup> | SCFAs-producer     |
|----------------------|-----------------------------------------|----------------------------------|--------------------|
| Healthy participants | <i>g__Candidatus Bacilloplasma</i>      | G <sup>+</sup>                   |                    |
|                      | <i>g__Lachnospiraceae FCS020 group</i>  | G <sup>+</sup>                   | Yes <sup>3,4</sup> |
|                      | <i>f__Streptomycetaceae</i>             | G <sup>+</sup>                   |                    |
|                      | <i>g__Lactococcus</i>                   | G <sup>+</sup>                   |                    |
|                      | <i>g__Anaerorhabdus furcosa group</i>   | G <sup>-</sup>                   |                    |
|                      | <i>g__Bacillus</i>                      | G <sup>+</sup>                   | Yes <sup>17</sup>  |
|                      | <i>g__Ruminiclostridium 5</i>           | G <sup>+</sup>                   | Yes <sup>7</sup>   |
|                      | <i>g__Sphingomonas</i>                  | G <sup>-</sup>                   |                    |
|                      | <i>g__Ruminococcus gauvreauii group</i> | G <sup>+</sup>                   | Yes <sup>18</sup>  |
|                      | <i>g__Cupriavidus</i>                   | G <sup>-</sup>                   |                    |
|                      | <i>g__Acidibacter</i>                   | G <sup>-</sup>                   |                    |
|                      | <i>g__Lachnospiraceae NC2004 group</i>  | G <sup>+</sup>                   | Yes <sup>18</sup>  |
|                      | <i>g__Romboutsia</i>                    | G <sup>+</sup>                   |                    |
|                      | <i>g__Weissella</i>                     | G <sup>+</sup>                   |                    |
|                      | <i>g__Barnesiella</i>                   | G <sup>-</sup>                   | Yes <sup>19</sup>  |
|                      | <i>g__Dorea</i>                         | G <sup>+</sup>                   | Yes <sup>20</sup>  |
|                      | <i>f__Brucellaceae</i>                  | G <sup>-</sup>                   |                    |
|                      | <i>g__Desulfovibrio</i>                 | G <sup>-</sup>                   | Yes <sup>4</sup>   |
|                      | <i>g__Pelomonas</i>                     | G <sup>-</sup>                   |                    |
|                      | <i>g__Haemophilus</i>                   | G <sup>-</sup>                   |                    |
|                      | <i>g__Microbacterium</i>                | G <sup>+</sup>                   |                    |
|                      | <i>g__Coprococcus 3</i>                 | G <sup>+</sup>                   | Yes <sup>4</sup>   |
|                      | <i>f__Lachnospiraceae g_uncultured</i>  | G <sup>+</sup>                   | Yes <sup>3</sup>   |
|                      | <i>f__Peptococcaceae g_uncultured</i>   | G <sup>+</sup>                   | Yes <sup>11</sup>  |
|                      | <i>g__Erysipelotrichaceae UCG 003</i>   | G <sup>+</sup>                   | Yes <sup>21</sup>  |
|                      | <i>g__Subdoligranulum</i>               | G <sup>+</sup>                   | Yes <sup>22</sup>  |
|                      | <i>g__Prevotella 9</i>                  | G <sup>-</sup>                   | Yes <sup>23</sup>  |
|                      | <i>g__Faecalibacterium</i>              | G <sup>+</sup>                   | Yes <sup>24</sup>  |
| CP patients          | <i>g__Escherichia_Shigella</i>          | G <sup>-</sup>                   |                    |
|                      | <i>g__Parabacteroides</i>               | G <sup>-</sup>                   | Yes <sup>16</sup>  |
|                      | <i>g__Eubacterium_hallii_group</i>      | G <sup>+</sup>                   | Yes <sup>24</sup>  |
|                      | <i>g__Sutterella</i>                    | G <sup>-</sup>                   |                    |
|                      | <i>o__Selenomonadales</i>               | G <sup>-</sup>                   |                    |
|                      | <i>g__Lachnospiraceae ND3007 group</i>  | G <sup>+</sup>                   | Yes <sup>18</sup>  |

G<sup>+</sup>: Gram-positive bacteria; G<sup>-</sup>: Gram-negative bacteria

**Table S4**, related to **Figure S4**: The characteristics of predominant microbial taxa of control mice, CP mice, G<sup>+</sup>ABX-treated CP mice and G<sup>-</sup> ABX-treated CP mice.

| Group                        | Bacteria                         | G <sup>+</sup> or G <sup>-</sup> | SCFAs-producer     |
|------------------------------|----------------------------------|----------------------------------|--------------------|
| Con                          | f__Muribaculaceae                | G <sup>-</sup>                   | Yes <sup>2</sup>   |
|                              | g__Lactobacillus                 | G <sup>+</sup>                   | Yes <sup>1</sup>   |
|                              | g__Faecalibaculum                | G <sup>+</sup>                   | Yes <sup>5</sup>   |
|                              | g__Prevotellaceae NK3B31 group   | G <sup>-</sup>                   | Yes <sup>6</sup>   |
|                              | g__Alloprevotella                | G <sup>-</sup>                   |                    |
|                              | g__Ruminococcus 1                | G <sup>+</sup>                   | Yes <sup>5</sup>   |
|                              | g__Desulfovibrio                 | G <sup>-</sup>                   | Yes <sup>4</sup>   |
|                              | g__Rikenellaceae RC9 gut group   | G <sup>-</sup>                   | Yes <sup>9</sup>   |
|                              | g__ASF356                        | G <sup>+</sup>                   | Yes <sup>10</sup>  |
|                              | g__Candidatus Saccharimonas      | G <sup>+</sup>                   |                    |
|                              | g__Ruminococcaceae UCG_009       | G <sup>+</sup>                   | Yes <sup>4,8</sup> |
|                              | g__Enterorhabdus                 | G <sup>+</sup>                   |                    |
|                              | g__Candidatus Arthromitus        | G <sup>+</sup>                   |                    |
|                              | g__Negativebacilli               | G <sup>-</sup>                   |                    |
|                              | g__Tyzzerella 3                  | G <sup>+</sup>                   |                    |
|                              | f__Desulfovibrionaceae           | G <sup>-</sup>                   |                    |
| g__Family XIII UCG_001       | G <sup>+</sup>                   |                                  |                    |
| CAE                          | g__Bifidobacterium               | G <sup>+</sup>                   | Yes <sup>1</sup>   |
|                              | g__Escherichia_Shigella          | G <sup>-</sup>                   |                    |
|                              | g__Prevotellaceae UCG_001        | G <sup>-</sup>                   | Yes <sup>25</sup>  |
|                              | g__Odoribacter                   | G <sup>-</sup>                   |                    |
|                              | o__Rhodospirillales              | G <sup>-</sup>                   | Yes <sup>1</sup>   |
|                              | o__Gastranaerophilales           | G <sup>-</sup>                   |                    |
|                              | g__Clostridiumsensustricto 1     | G <sup>+</sup>                   |                    |
|                              | f__Christensenellaceae           | G <sup>-</sup>                   | Yes <sup>12</sup>  |
|                              | g__Defluviitaleaceae UCG_011     | G <sup>+</sup>                   |                    |
|                              | g__Alistipes                     | G <sup>-</sup>                   | Yes <sup>26</sup>  |
| G <sup>-</sup> ABX+CAE       | g__Lachnospiraceae NK4A136 group | G <sup>+</sup>                   | Yes <sup>3,4</sup> |
|                              | f__Clostridialesvadin BB60 group |                                  |                    |
|                              | g__Parabacteroides               | G <sup>-</sup>                   | Yes <sup>16</sup>  |
|                              | g__Ruminiclostridium 6           | G <sup>+</sup>                   | Yes <sup>7</sup>   |
|                              | g__Erysipelatoclostridium        | G <sup>+</sup>                   |                    |
|                              | g__Angelakisella                 | G <sup>-</sup>                   |                    |
|                              | g__Coprococcus 3                 | G <sup>+</sup>                   | Yes <sup>4</sup>   |
| g__Coriobacteriaceae UCG_002 | G <sup>+</sup>                   | Yes <sup>13</sup>                |                    |

G<sup>+</sup>: Gram-positive bacteria; G<sup>-</sup>: Gram-negative bacteria

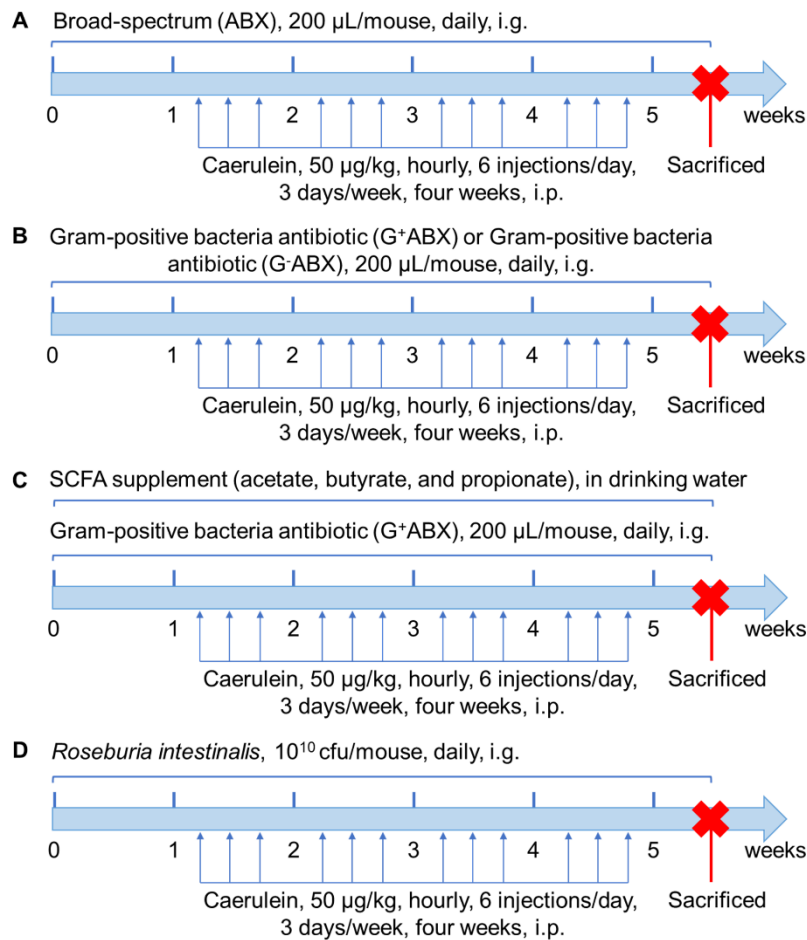

**Figure S1**, related to **Methods**: Schematic diagram showing the experimental design and timeline of CP mice with different treatments. (A) Animal protocol for chronic pancreatitis mice treated with broad spectrum antibiotic. (B) Animal protocol for chronic pancreatitis mice treated with Gram-positive bacteria antibiotic or Gram-negative bacteria probiotic. (C) Animal protocol for chronic pancreatitis mice treated with Gram-positive bacteria antibiotic and SCFA supplement. (D) Animal protocol for chronic pancreatitis mice treated with *Roseburia intestinalis*.

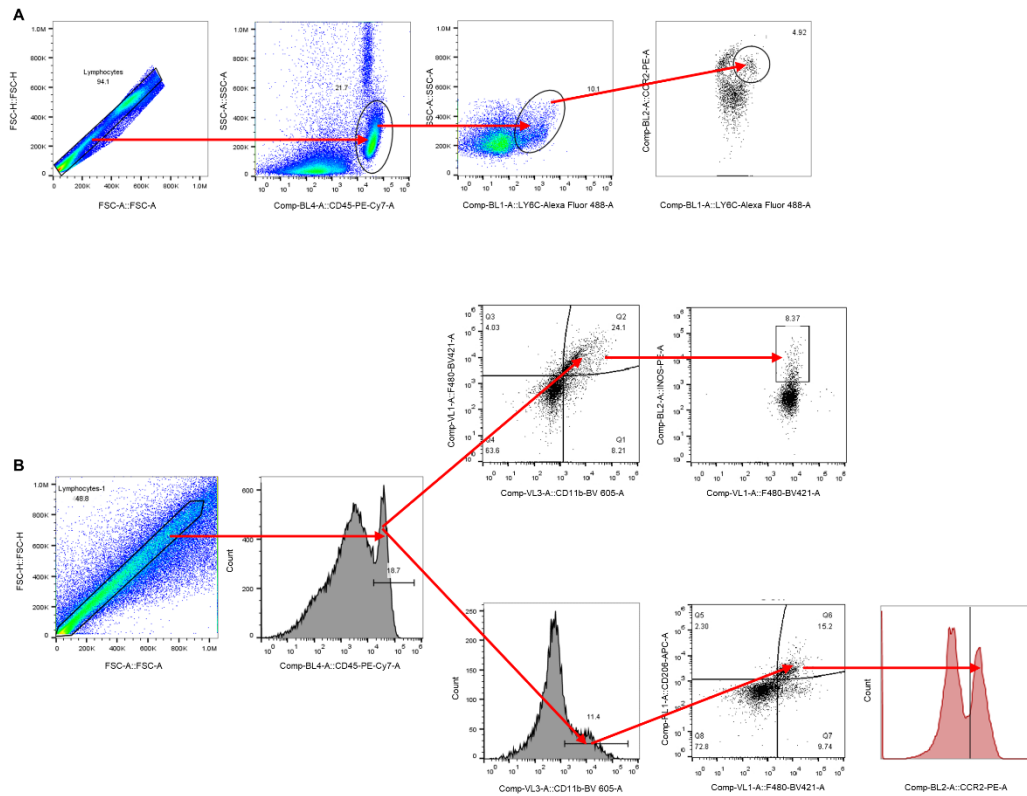

**Figure S2**, related to **Methods**: Gating strategies for flow cytometry. (A) Gating strategy for CCR2<sup>+</sup> monocytes (CD45<sup>+</sup>CD11b<sup>+</sup>Ly6C<sup>hi</sup>CCR2<sup>+</sup>). (B) Gating strategy for M1 macrophages (CD45<sup>+</sup>CD11b<sup>+</sup>F4/80<sup>+</sup>iNOS<sup>+</sup>), M2 macrophages (CD45<sup>+</sup>CD11b<sup>+</sup>F4/80<sup>+</sup>CD206<sup>+</sup>) and CCR2<sup>+</sup> M2 macrophages (CD45<sup>+</sup>CD11b<sup>+</sup>F4/80<sup>+</sup>CD206<sup>+</sup>CCR2<sup>+</sup>).



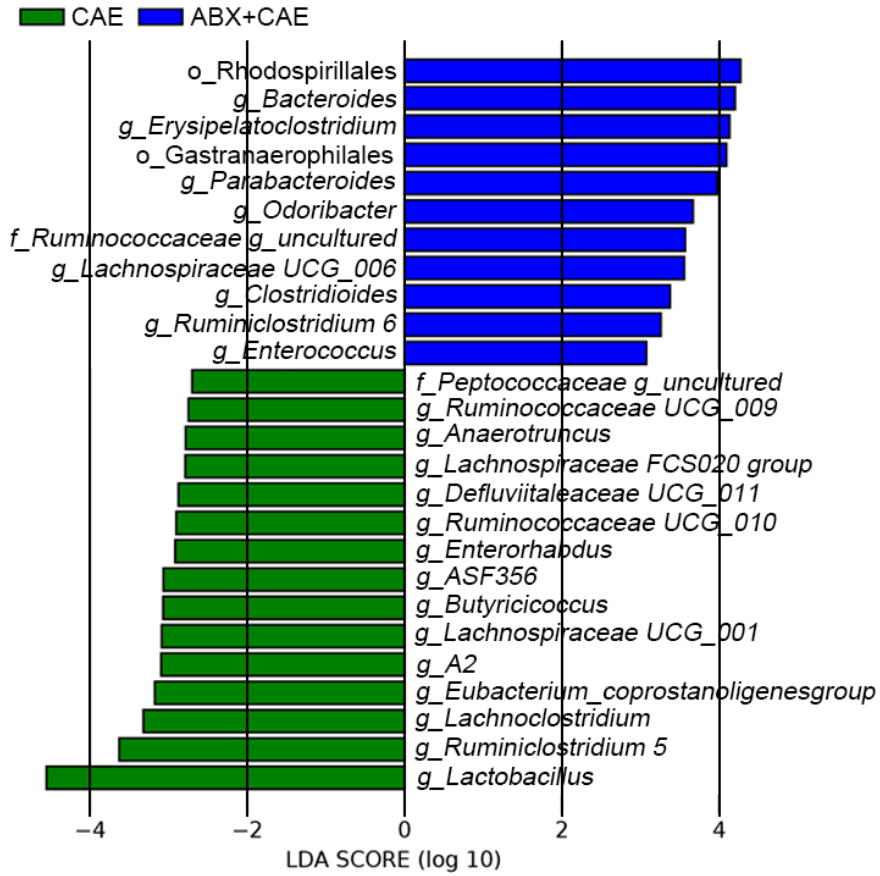

**Figure S3**, related to **Figure 1**. The LEfSe analyses of microbiome composition distribution of CP mice and broad-spectrum ABX-treated CP mice (CAE,  $n = 10$ ; ABX+CAE,  $n = 10$ ).

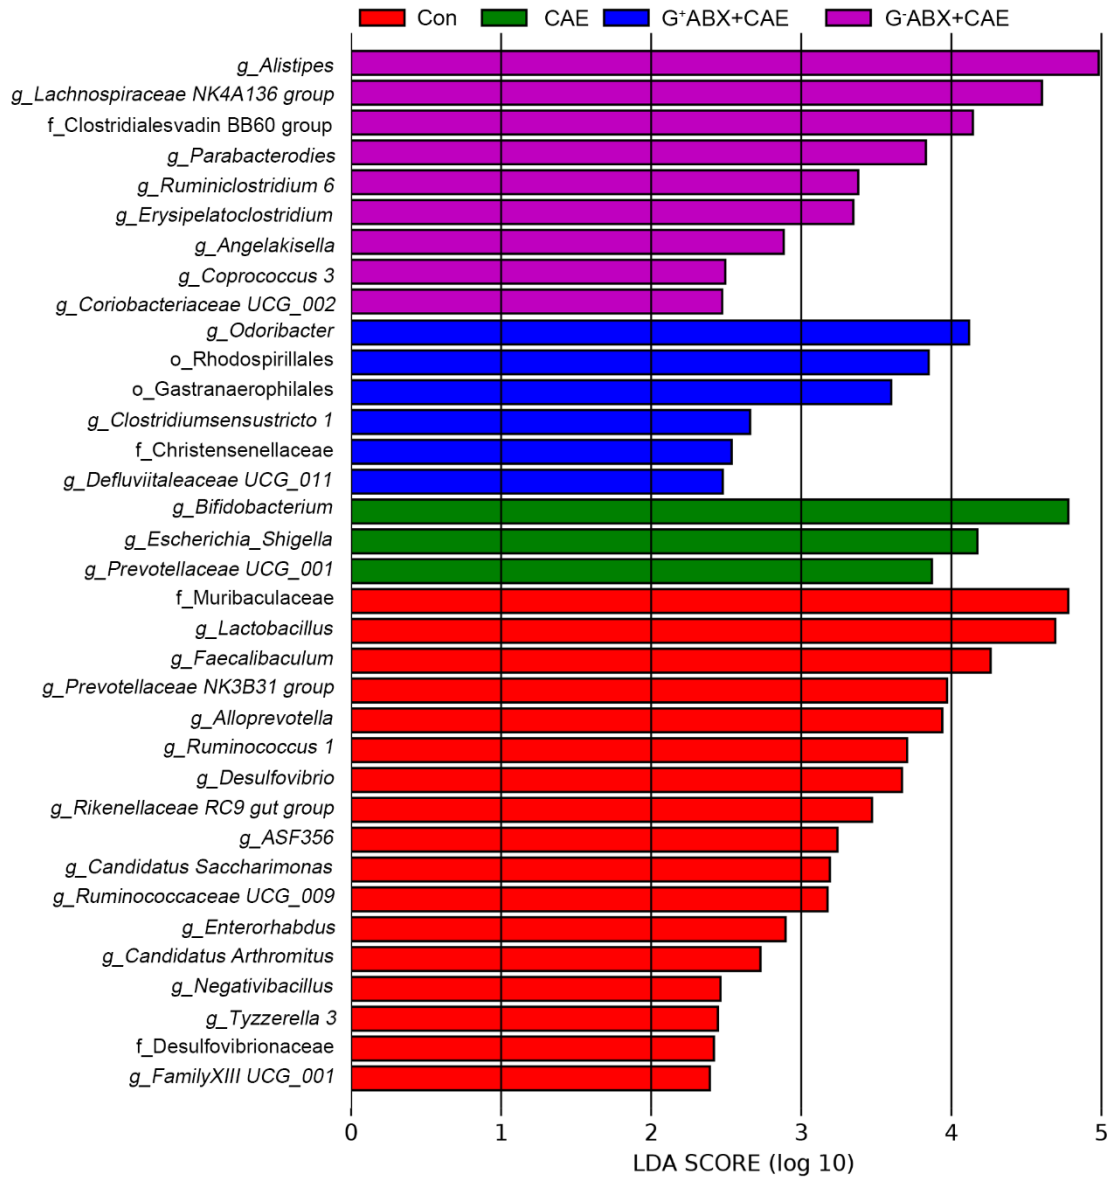

**Figure S4**, related to **Figure 3**. The LEfSe analyses of microbiome composition of control mice, CP mice, G<sup>+</sup>ABX-treated CP mice and G<sup>-</sup> ABX-treated CP mice (Con,  $n = 8$ ; CAE,  $n = 10$ ; G<sup>+</sup> ABX+CAE,  $n = 10$ ; G<sup>-</sup> ABX+CAE,  $n = 10$ ).

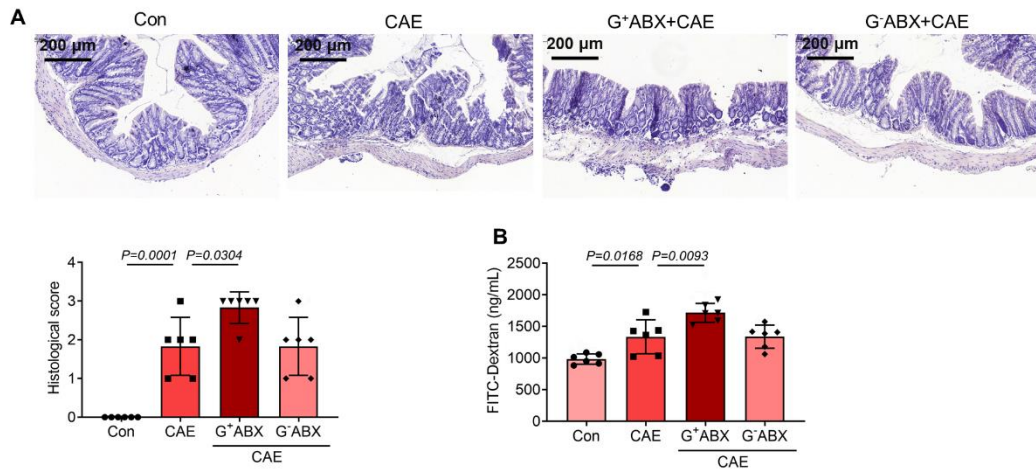

**Figure S5**, related to **Figure 3**. Depletion of G<sup>+</sup> bacteria but not G<sup>-</sup> bacteria compromises gut barrier function in mice with CP. (A) The representative images and histological scores of the colon by H&E staining ( $n = 6$ ). Scale bar: 200  $\mu$ m. (B) Intestinal permeability assessment by measuring FITC-dextran ( $n = 6$ ). Data are representative and were the mean  $\pm$  SD from three independent experiments.  $P$  values were calculated by one-way ANOVA followed by Tukey's *post hoc* test for multiple comparisons.

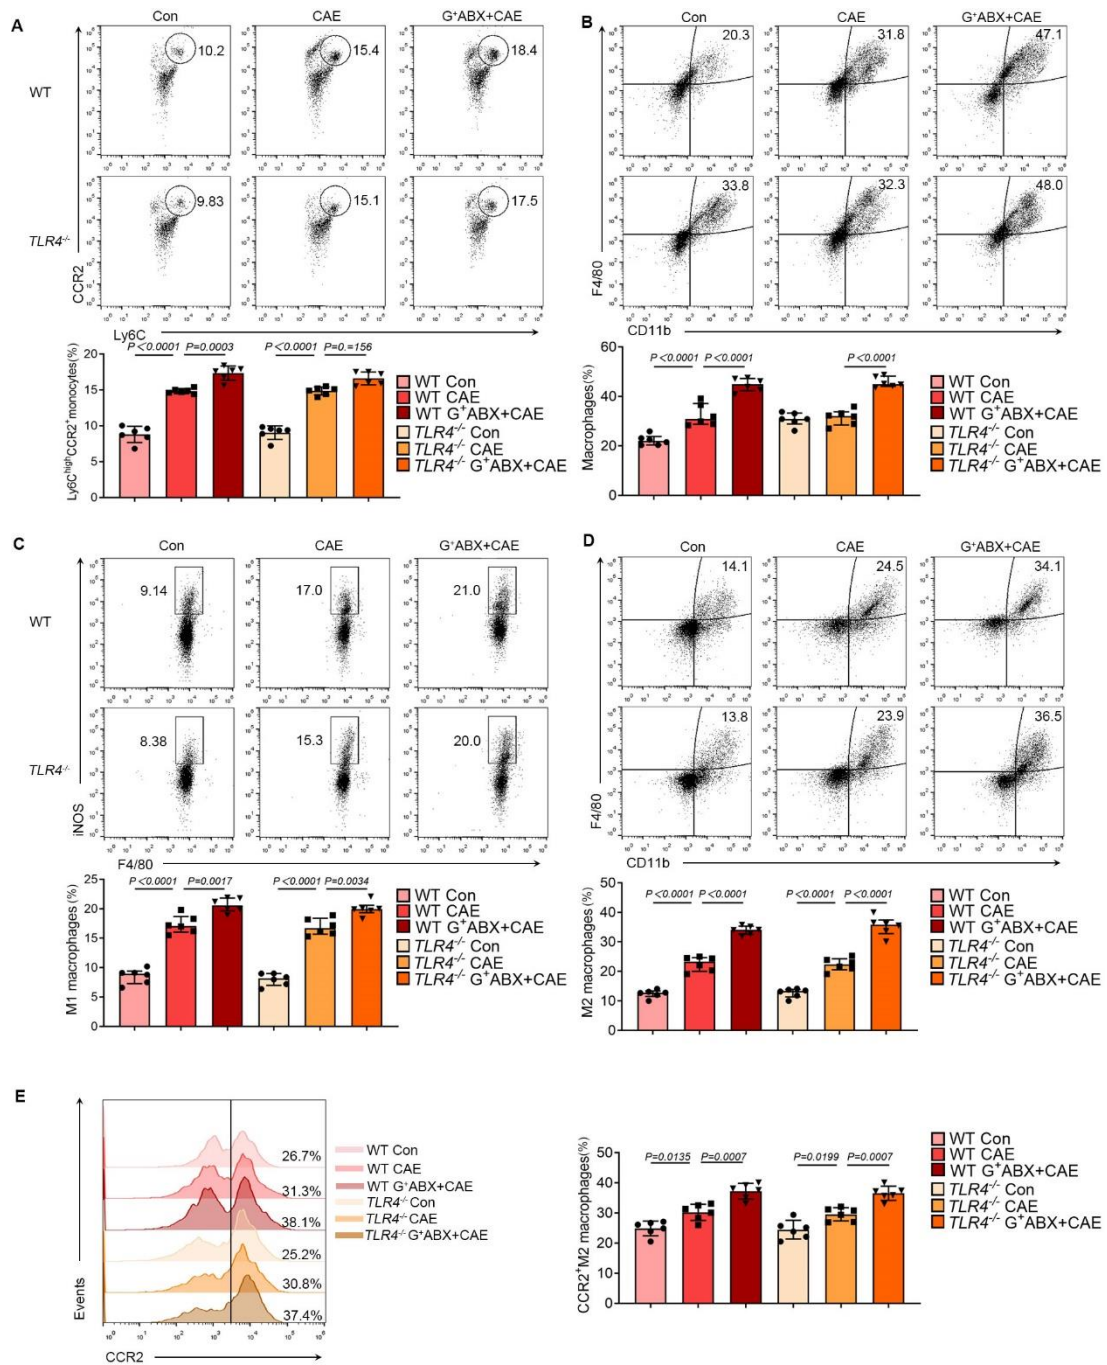

**Figure S6**, related to **Figure 4**. TLR4 deficiency does not affect the frequency of monocytes and macrophages. (A) The frequency of Ly6C<sup>hi</sup>CCR2<sup>+</sup> monocytes among CD45<sup>+</sup>CD11b<sup>+</sup> population. (B) The frequency of CD11b<sup>+</sup>F4/80<sup>+</sup> macrophages among CD45<sup>+</sup> population. (C) The frequency of iNOS<sup>+</sup> M1 macrophages among CD45<sup>+</sup>CD11b<sup>+</sup>F4/80<sup>+</sup> population. (D) The frequency of F4/80<sup>+</sup>CD206<sup>+</sup> M2 macrophages among CD45<sup>+</sup>CD11b<sup>+</sup> population. (E) The frequency of CCR2<sup>+</sup> M2 macrophages among CD45<sup>+</sup>CD11b<sup>+</sup> F4/80<sup>+</sup>CD206<sup>+</sup> population ( $n = 6$ ). Data are representative and were the median  $\pm$  interquartile range from three independent experiments.  $P$  values were calculated by one-way ANOVA followed by Tukey's *post hoc* test for multiple comparisons.

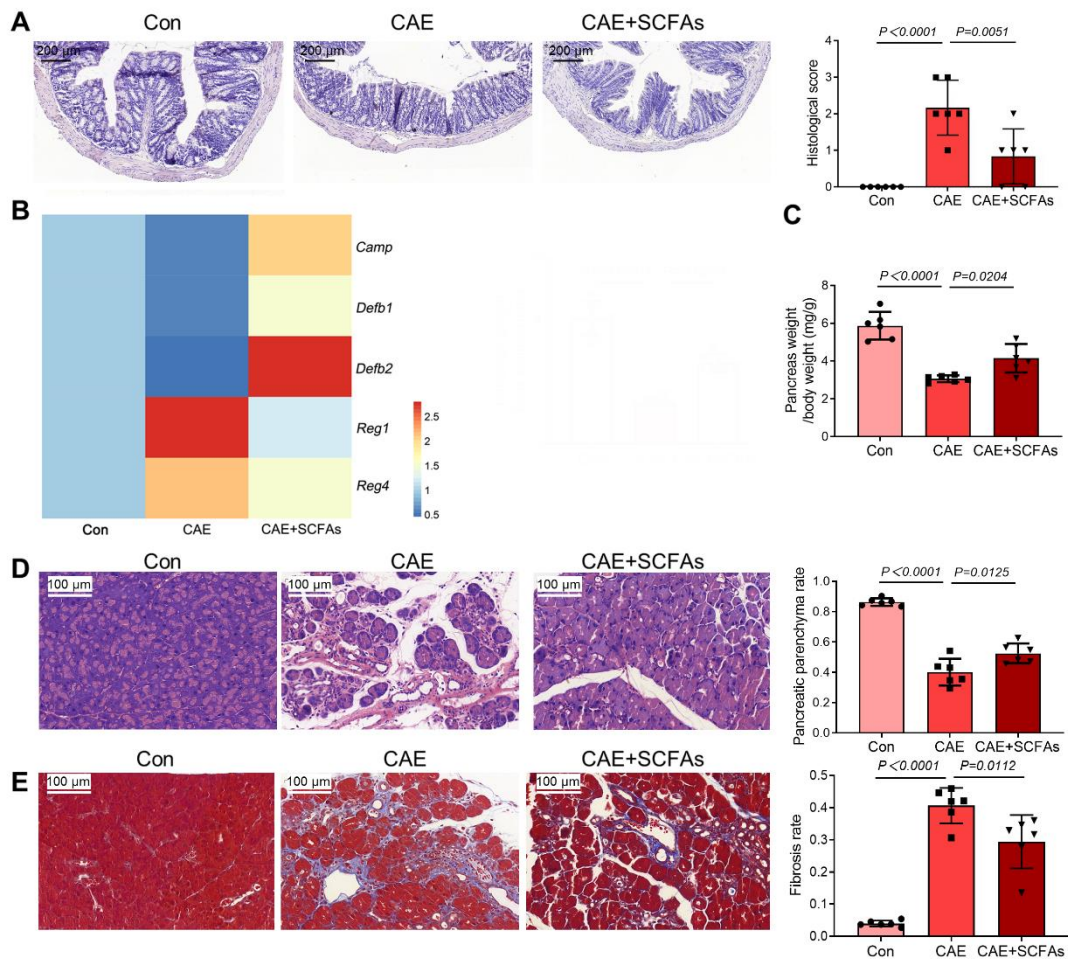

**Figure S7**, related to **Figure 5**. SCFAs improve gut barrier dysfunction and alleviates the severity of CP. (A) The representative images and histological scores of the colon by H&E staining ( $n = 6$ ). Scale bar: 200  $\mu\text{m}$ . (B) The mRNA expression of antimicrobial peptides (*Camp*, *Defb1*, *Defb2*, *Reg1* and *Reg4*,  $n = 6$ ). (C) The ratio of pancreatic weight and body weight ( $n = 6$ ). (D) The representative images and parenchyma rates of the pancreas by H&E staining ( $n = 6$ ). Scale bar: 100  $\mu\text{m}$ . (E) The representative images and fibrosis rates of the pancreas by Masson's Trichrome staining ( $n = 6$ ). Scale bar: 100  $\mu\text{m}$ . Data are representative and were the mean  $\pm$  SD from three independent experiments.  $P$  values were calculated by one-way ANOVA followed by Tukey's *post hoc* test for multiple comparisons.

## References

- 1 Zhang Z, He S, Cao X, Ye Y, Yang L, Wang J, et al. Potential prebiotic activities of soybean peptides Maillard reaction products on modulating gut microbiota to alleviate aging-related disorders in D-galactose-induced ICR mice. *J Funct Foods* 2020;**65**:103729.
- 2 Qiu X, Chen C, Chen X. Lipocalin 2 deficiency restrains aging-related reshaping of gut microbiota structure and metabolism. *Biomolecules* 2021;**11**:1286.
- 3 Louis P, Flint HJ. Formation of propionate and butyrate by the human colonic microbiota. *Environ Microbiol* 2017;**19**:29-41.
- 4 Mirzaei R, Bouzari B, Hosseini-Fard SR, Mazaheri M, Ahmadyousefi Y, Abdi M, et al. Role of microbiota-derived short-chain fatty acids in nervous system disorders. *Biomed Pharmacother* 2021;**139**:111661.
- 5 Feng W, Ao H, Peng C. Gut microbiota, short-chain fatty acids, and herbal medicines. *Front Pharmacol* 2018;**9**:1354.
- 6 Wu WY, Chou PL, Yang JC, Chien CT. Silicon-containing water intake confers antioxidant effect, gastrointestinal protection, and gut microbiota modulation in the rodents. *PLoS One* 2021;**16**:e0248508.
- 7 Osbelt L, Thiemann S, Smit N, Lesker TR, Strowig T. Variations in microbiota composition of laboratory mice influence *Citrobacter rodentium* infection via variable short-chain fatty acid production. *PLoS Pathog* 2020;**16**:e1008448.
- 8 Vojinovic D, Radjabzadeh D, Kurilshikov A, Amin N, Wijmenga C, Franke L, et al. Relationship between gut microbiota and circulating metabolites in population-based cohorts. *Nat Commun* 2019;**10**:5813.
- 9 Liu HX, Rocha CS, Dandekar S, Wan YJ. Functional analysis of the relationship between intestinal microbiota and the expression of hepatic genes and pathways during the course of liver regeneration. *J Hepatol* 2016;**64**:641-650.
- 10 Smith PM, Howitt MR, Panikov N, Michaud M, Gallini CA, Bohlooly YM, et al. The microbial metabolites, short-chain fatty acids, regulate colonic Treg cell homeostasis. *Science* 2013;**341**:569-573.
- 11 Lee J, Venna VR, Durgan DJ, Shi H, Hudobenko J, Putluri N, et al. Young versus aged microbiota transplants to germ-free mice: increased short-chain fatty acids and improved cognitive performance. *Gut Microbes* 2020;**12**:1-14.
- 12 Calderón-Pérez L, Gosalbes MJ, Yuste S, Valls RM, Pedret A, Llauradó E, et al. Gut metagenomic and short chain fatty acids signature in hypertension: a cross-sectional study. *Sci Rep* 2020;**10**:6436.
- 13 Huang H, Li K, Lee Y, Chen M. Preventive effects of *Lactobacillus* mixture against chronic kidney disease progression through enhancement of beneficial bacteria and downregulation of gut-derived uremic toxins. *J Agric Food Chem* 2021;**69**:7353-7366.
- 14 Mishra AK, Kumar SS, Ghosh AR. Probiotic *Enterococcus faecalis* AG5 effectively assimilates cholesterol and produces fatty acids including propionate. *FEMS Microbiol Lett* 2019;**366**:fnz039.

- 15 Aho VTE, Houser MC, Pereira PAB, Chang J, Rudi K, Paulin L, et al. Relationships of gut microbiota, short-chain fatty acids, inflammation, and the gut barrier in Parkinson's disease. *Mol Neurodegener* 2021;**16**:6.
- 16 Du X, Xiang Y, Lou F, Tu P, Zhang X, Hu X, et al. Microbial community and short-chain fatty acid mapping in the intestinal tract of quail. *Animals (Basel)* 2020;**10**:1006.
- 17 Xu Y, Yu Y, Shen Y, Li Q, Lan J, Wu Y, et al. Effects of *Bacillus subtilis* and *Bacillus licheniformis* on growth performance, immunity, short chain fatty acid production, antioxidant capacity, and cecal microflora in broilers. *Poult Sci* 2021;**100**:101358.
- 18 Vacca M, Celano G, Calabrese FM, Portincasa P, Gobetti M, De Angelis M. The controversial role of human gut *Lachnospiraceae*. *Microorganisms* 2020;**8**:573.
- 19 Nogal A, Louca P, Zhang X, Wells PM, Steves CJ, Spector TD, et al. Circulating levels of the short-chain fatty acid acetate mediate the effect of the gut microbiome on visceral fat. *Front Microbiol* 2021;**12**:711359.
- 20 Nishiwaki H, Ito M, Hamaguchi T, Maeda T, Kashihara K, Tsuboi Y, et al. Short chain fatty acids-producing and mucin-degrading intestinal bacteria predict the progression of early Parkinson's disease. *NPJ Parkinsons Dis* 2022;**8**:65.
- 21 Liu S, Li E, Sun Z, Fu D, Duan G, Jiang M, et al. Altered gut microbiota and short chain fatty acids in Chinese children with autism spectrum disorder. *Sci Rep* 2019;**9**:287.
- 22 Van Hul M, Le Roy T, Prifti E, Dao MC, Paquot A, Zucker JD, et al. From correlation to causality: the case of *Subdoligranulum*. *Gut Microbes* 2020;**12**:1-13.
- 23 Chen T, Long W, Zhang C, Liu S, Zhao L, Hamaker BR. Fiber-utilizing capacity varies in *Prevotella*- versus *Bacteroides*-dominated gut microbiota. *Sci Rep* 2017;**7**:2594.
- 24 Markowiak-Kopeć P, Śliżewska K. The effect of probiotics on the production of short-chain fatty acids by human intestinal microbiome. *Nutrients* 2020;**12**:1107.
- 25 Song X, Zhong L, Lyu N, Liu F, Li B, Hao Y, et al. Inulin can alleviate metabolism disorders in ob/ob mice by partially restoring leptin-related pathways mediated by gut microbiota. *Genomics Proteomics Bioinformatics* 2019;**17**:64-75.
- 26 Parker BJ, Wearsch PA, Veloo ACM, Rodriguez-Palacios A. The genus *Alistipes*: gut bacteria with emerging implications to inflammation, cancer, and mental health. *Front Immunol* 2020;**11**:906.
